# Supplementary material for: Clinical Predictors and Prognosis of Recurrent IgA Nephropathy in the Kidney Allograft
Source: PubMed Central journal article supplement — Glomerular Dis. 2021 Sep 24;2(1):42–53. doi: 10.1159/000519834 (PMC9017582; doi:10.1159/000519834), 2021-09-24
Supplement: NIHMS1746629-supplement-1.pdf [file NIHMS1746629-supplement-1.pdf]

**Supplemental Material****Supplemental Table 1: Multivariable analyses of the associations with recurrent disease in recipients of kidney allograft from living-related donors**

| Variables                                   | Multivariable (n=90), N events=29 |         |
|---------------------------------------------|-----------------------------------|---------|
|                                             | aHR (95% CI)                      | P value |
| Recipient age at transplant (per each year) | 0.95 (0.92-0.99)                  | 0.006   |
| Medical Sites                               |                                   |         |
| CUIMC                                       | Ref                               | –       |
| OHSU                                        | 2.29 (0.71-7.37)                  | 0.2     |
| HUC                                         | 6.57E-08 (0-inf)                  | 0.99    |
| Year of transplantation                     | 1.16 (1.05-1.29)                  | 0.004   |
| # HLA matches (per antigen: 0-6)            | 1.40 (1.07-1.83)                  | 0.01    |
| Induction with Thymoglobulin                | 0.65 (0.36 – 1.15)                | 0.8     |

Only variables with P<0.1 on univariable analysis in Table 2 were included in this multivariable analysis.

Abbreviations: CUIMC, Columbia University Irving Medical center; OHSU, Oregon Health & Science University; HUC, Hospitais da Universidade de Coimbra

**Supplemental Table 2: Multivariable analyses of the associations with recurrent disease in recipients of kidney allograft from living-unrelated or deceased donors**

| Variables                                   | Multivariable (n=177), N events=40 |         |
|---------------------------------------------|------------------------------------|---------|
|                                             | aHR (95% CI)                       | P value |
| Recipient age at transplant (per each year) | 0.97 (0.94-0.99)                   | 0.03    |
| Medical Sites                               |                                    |         |
| CUIMC                                       | Ref                                | –       |
| OHSU                                        | 0.91 (0.38-2.20)                   | 0.8     |
| HUC                                         | 0.58 (0.22-1.55)                   | 0.3     |
| Year of transplantation                     | 1.04 (0.98-1.11)                   | 0.2     |
| # HLA matches (per antigen: 0-6)            | 1.02 (0.81-1.29)                   | 0.9     |
| Induction with Thymoglobulin                | 0.46 (0.21-1.00)                   | 0.05    |

Only variables with P<0.1 on univariable analysis in Table 2 were included in this multivariable analysis.

Abbreviations: CUIMC, Columbia University Irving Medical center; OHSU, Oregon Health & Science University; HUC, Hospitais da Universidade de Coimbra

**Supplemental Table 3: Clinical, laboratory and histologic characteristics of recurrent IgAN at diagnosis**

| <b>Variables</b>                                                                               | <b>Recurrent IgAN (n=80)</b>                                          |
|------------------------------------------------------------------------------------------------|-----------------------------------------------------------------------|
| Recipient age at biopsy (years)                                                                | 43 (34, 49)                                                           |
| Post-transplant biopsy type                                                                    |                                                                       |
| Clinical                                                                                       | 73/80 (91%)                                                           |
| Protocol                                                                                       | 7/80 (9%)                                                             |
| Post-transplant interval to biopsies (months)                                                  | 43 (13, 111)                                                          |
| Serum creatinine (mg/dL) <sup>1</sup>                                                          | 1.9 (1.5, 2.5)                                                        |
| Proteinuria (g/g) <sup>2</sup>                                                                 | 0.5 (0.2, 2.0)                                                        |
| Concurrent acute rejection                                                                     | 16/80 (20%)<br>[11 T-cell mediated, 2 antibody-mediated, and 3 mixed] |
| Diffuse mesangial proliferation (M1) <sup>3</sup>                                              | 36/79 (46%)                                                           |
| Endocapillary proliferation (E1) <sup>3</sup>                                                  | 26/79 (33%)                                                           |
| Cellular/fibrocellular crescents <sup>3</sup><br>(involving <25% of glomeruli in all cases C1) | 13/79 (16%)                                                           |
| Segmental sclerosis (S1) <sup>3</sup>                                                          | 40/79 (51%)                                                           |
| Tubular atrophy/interstitial fibrosis (T)                                                      |                                                                       |
| - 26-50% (T1)                                                                                  | 26/79 (33%)                                                           |
| - >50% (T2)                                                                                    | 12/79 (15%)                                                           |
| Combined MEST-C score (0-7) <sup>3</sup>                                                       | 2 (1, 3)                                                              |

<sup>1</sup> Information on serum creatinine was not available for 4 patients

<sup>2</sup> Information on proteinuria was not available for 11 patients; proteinuria was estimated from spot urine protein in 6 patients

<sup>3</sup> Histologic Oxford scores could not be assessed in 1 patient

**Supplemental Table 4: Treatment of recurrent IgAN**

| <b>Treatment *</b>          | <b>Recurrent IgAN (n=71)</b> |
|-----------------------------|------------------------------|
| Conservative treatment only | 32/71 (45%)                  |
| Corticosteroids             | 32/71 (45%)                  |
| Thymoglobulin               | 3/71 (4%)                    |
| Rituximab                   | 2/71 (3%)                    |
| Others                      | 2/71 (3%)                    |

Conservative treatment was defined as treatment that did not involve additional immunosuppressive therapy (e.g. no specific treatment, angiotensin converting enzyme inhibitors, angiotensin-receptor blockers, and fish oil)

- Of patients treated with Thymoglobulin, 1 patient also received IVIG. All three patients had concurrent T cell mediated rejection

- Of patients treated with corticosteroids: 3 patients received concurrent IVIG (two for antibody-mediated rejection and the other for plasma cell-rich T cell mediated rejection)

- Of patients treated with Rituximab, 1 of the 2 patients had concurrent antibody-mediated rejection

- For others: 1 patient was treated with increased dose mycophenolate mofetil and the other was converted from tacrolimus to belatacept given the presence of significant arteriolar hyalinosis
